# Supplementary material for: Physical exercise and cognitive engagement outcomes for mild neurocognitive disorder: a group-randomized pilot trial
Source: Springer Nature journal article supplement (doi:10.1186/s13063-018-2865-3), 2018-10-19
Supplement: MOESM1 [file 16213250]

## Supplement 1. Supplementary Neuroimaging Protocol

MRI acquisitions will be conducted using a 3T Siemens Prisma. The 3T Siemens Prisma whole body scanner includes simultaneous multi-slice (SMS) techniques for functional MRI (fMRI) and diffusion imaging (dMRI) as outlined in the Human Connectome Project. The Siemens Prisma includes an 80 mT/m @ 200 T/m/s gradient system, parallel transmit capabilities, and a series of MR coils including a 64-channel head/neck coil used for the investigation. Information that is more specific can be found in Table S1.

Table S1. Neuroimaging specifics.

| Sequence Name             | FOV and resolution in mm                | Parameters (ms)                                    | Run time in minutes                                                      | Purpose                                                                 | Notes                                                                                                                                          |
|---------------------------|-----------------------------------------|----------------------------------------------------|--------------------------------------------------------------------------|-------------------------------------------------------------------------|------------------------------------------------------------------------------------------------------------------------------------------------|
| <b>MP-RAGE</b>            | Sagittal:<br>256x256x20<br>8 (1x1x1 mm) | TR=2000,<br>TE=2.91,<br>TI=1010, Flip<br>angle=8°  | 3:33                                                                     | T1-weighted structural analyses, lacunar infarction quantification      |                                                                                                                                                |
| <b>T2</b>                 | Sagittal:<br>256x256x20<br>8 (1x1x1 mm) | TR=2500,<br>TE=370, Flip<br>angle=120°             | 4:15                                                                     | T2-weighted structural analyses (combined with and independent from T1) |                                                                                                                                                |
| <b>3D T2 FLAIR</b>        | Sagittal:<br>256x256x17<br>6 (1x1x1 mm) | TR=4800,<br>TE=441,<br>TI=1650, Flip<br>angle=120° | 6:58                                                                     | Quantification of white matter disease                                  |                                                                                                                                                |
| <b>SWI</b>                | Axial:<br>256x256x12<br>8 (1x1x1 mm)    | TR=35,<br>TE=15, Flip<br>angle=12°                 | 5:35                                                                     | Analysis of hemorrhage/blood products, calcium, and iron                |                                                                                                                                                |
| <b>Resting state fMRI</b> | Axial:<br>80x80x43<br>(3x3x3 mm)        | TR=3500,<br>TE=30, Flip<br>angle=80°               | 10:00                                                                    | Functional connectivity analyses                                        |                                                                                                                                                |
| <b>pASL</b>               | Axial:<br>64x64x9<br>(4x4x8)            | TR=2500,<br>TE=12, Flip<br>angle=90°               | 3:52                                                                     | Metabolism and perfusion analyses                                       |                                                                                                                                                |
| <b>DWI</b>                | Axial:<br>128x128x19<br>7 (2x2x2 mm)    | TR=3200,<br>TE=70, Flip<br>angle=90°               | 10:52 (plus<br>0:33 for<br>each<br>additional<br>AP and PA<br>b0 images) | Structural connectivity analyses                                        | AP and PA phase reversed b0 images also acquired to assist in distortion correction. SMS = 3, Multi-shell acquisition: b = 0, 1000, 2000, 3000 |

---

*Abbreviations:* DWI: Diffusion Weighted Imaging; fMRI: functional Magnetic Resonance Imaging; FLAIR: Fluid Attenuated Inversion Recovery; FOV: field-of-view; mm: millimeters; ms: milliseconds; MP-RAGE: magnetization prepared rapid gradient-echo; pASL: pulsed Arterial Spin Labeling; TE: Echo Time; TI: Inversion Time; TR: Repetition Time; SMS: simultaneous multi-slice; SWI: susceptibility weighted imaging.
