# Supplementary material for: Physical exercise and cognitive engagement outcomes for mild neurocognitive disorder: a group-randomized pilot trial
Source: Springer Nature journal article supplement (doi:10.1186/s13063-018-2865-3), 2018-10-19
Supplement: MOESM4 [file 16213250]

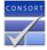

## CONSORT 2010 checklist of information to include when reporting a pilot or feasibility randomized trial in a journal or conference abstract

| Item               | Description                                                                                                 | Reported on line number |
|--------------------|-------------------------------------------------------------------------------------------------------------|-------------------------|
| Title              | Identification of study as randomised pilot or feasibility trial                                            | 1                       |
| Authors *          | Contact details for the corresponding author                                                                | 38                      |
| Trial design       | Description of pilot trial design (eg, parallel, cluster)                                                   | 8                       |
| Methods            |                                                                                                             |                         |
| Participants       | Eligibility criteria for participants and the settings where the pilot trial was conducted                  | 11                      |
| Interventions      | Interventions intended for each group                                                                       | 11-12                   |
| Objective          | Specific objectives of the pilot trial                                                                      | 6-10                    |
| Outcome            | Prespecified assessment or measurement to address the pilot trial objectives**                              | 18                      |
| Randomization      | How participants were allocated to interventions                                                            | 14                      |
| Blinding (masking) | Whether or not participants, care givers, and those assessing the outcomes were blinded to group assignment | 14-15                   |
| Results            |                                                                                                             |                         |
| Numbers randomized | Number of participants screened and randomised to each group for the pilot trial objectives**               | 10-11                   |
| Recruitment        | Trial status†                                                                                               |                         |
| Numbers analysed   | Number of participants analysed in each group for the pilot objectives**                                    | NA                      |
| Outcome            | Results for the pilot objectives, including any expressions of uncertainty**                                | NA                      |
| Harms              | Important adverse events or side effects                                                                    | NA                      |
| Conclusions        | General interpretation of the results of pilot trial and their implications for the future definitive trial | NA                      |
| Trial registration | Registration number for pilot trial and name of trial register                                              | 22                      |
| Funding            | Source of funding for pilot trial                                                                           |                         |

By Eldridge SM, Chan CL, Campbell MJ, Bond CM, Hopewell S, Thabane L, et al. CONSORT 2010 statement: extension to randomised pilot and feasibility trials. *BMJ*. 2016;355.
